# Supplementary material
Source: PubMed Central journal article supplement (PMC4197137)
Supplement: NIHMS627027-supplement-1.pdf [file NIHMS627027-supplement-1.pdf]

## Supplementary Figure 1. Data analysis overview

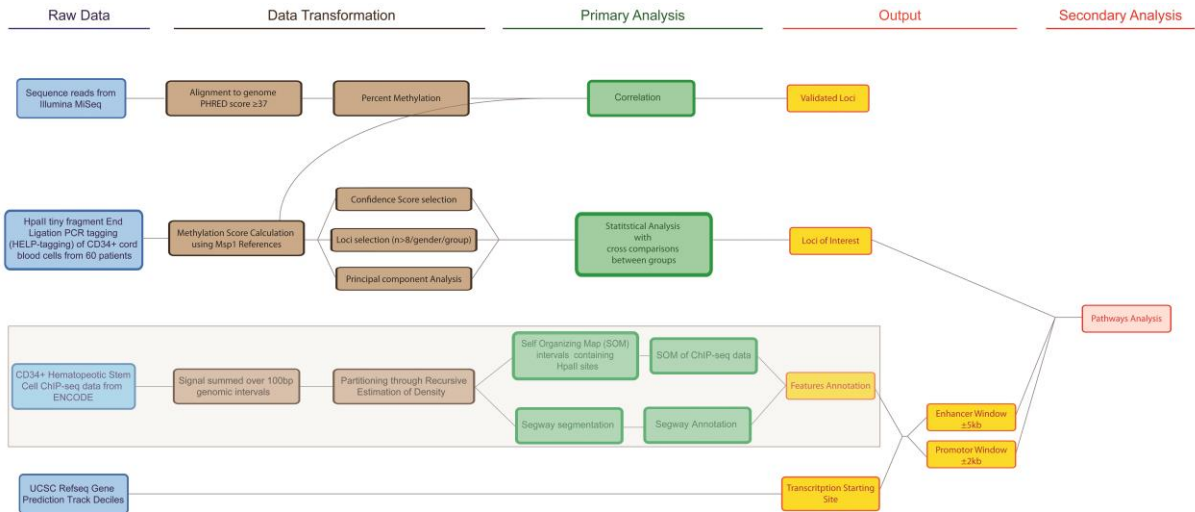

We show a flowchart of analytical procedures from raw data through the data processing steps used in generation of primary and secondary analysis. The gray box represents analysis shared between this study and that of a co-submitted manuscript (Wijetunga, Delahaye *et al.*).

**Supplementary Figure 2.** Overlap of genes dysregulated as a response to extreme fetal growth

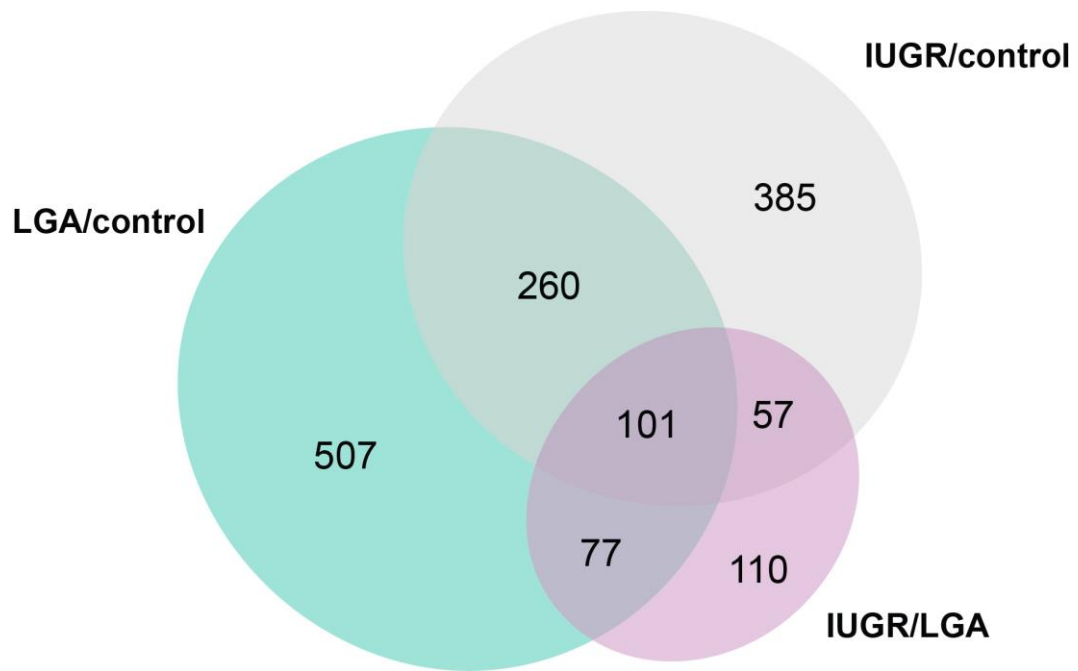

**Supplementary Figure 3** Sex-specific Gene Set Enrichment Analysis (GSEA) plot onto KEGG pathways

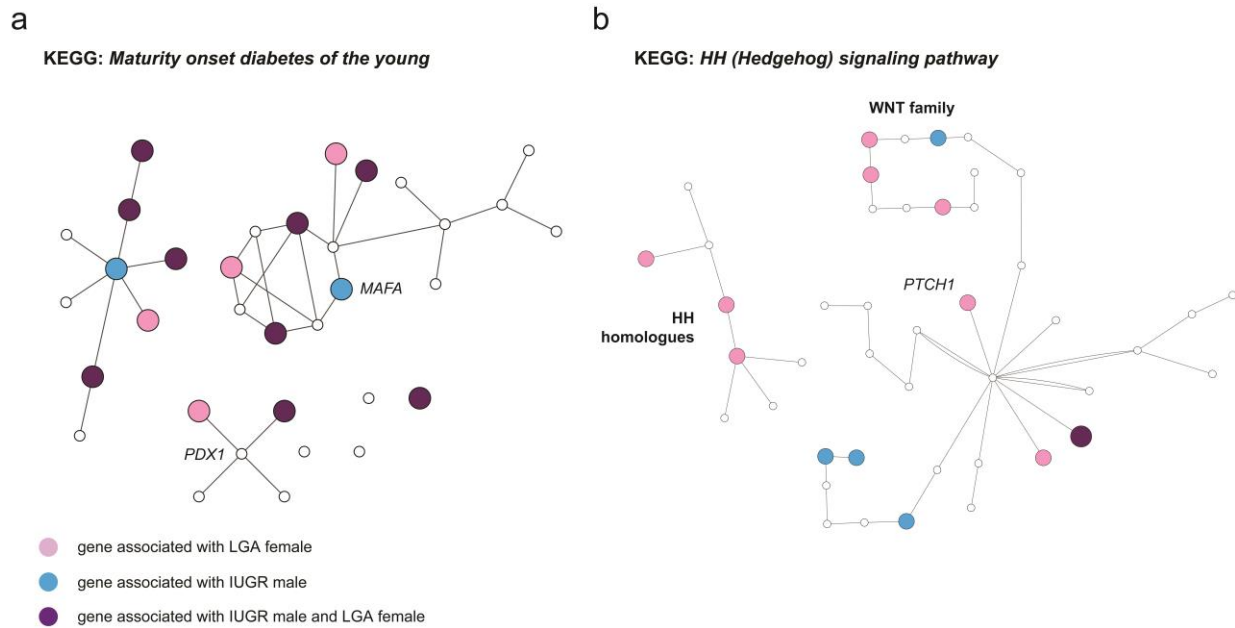

Network representations of KEGG pathways for the (a) *Maturity onset diabetes of the young* and (b) *Hedgehog (HH) signaling pathway*. Nodes are color- and size-coded based on the gene associated with differentially-methylated loci for LGA compared with control females (pink), IUGR compared with control males (blue) and those that are common to both LGA and IUGR groups (purple). Those not associated in either comparison are shown in white. Edges (solid lines) represent known physical interactions between protein products of genes.

**Supplementary Figure 4** Correlations between HELP-tagging and MassArray results

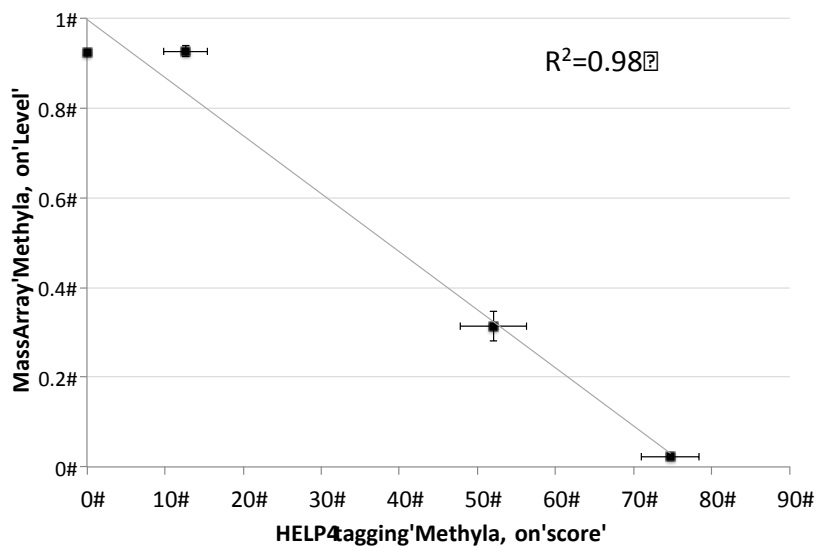

| Primer | Locus |                   | Methylation Score MassArray | Methylation Score HELP-Tagging |
|--------|-------|-------------------|-----------------------------|--------------------------------|
| DL5.1  | chr1  | 32704998 32704999 | 0.923±0.005                 | 0±0.000                        |
| DL4.3  | chr7  | 2661007 2661008   | 0.926±0.01                  | 12.649±2.769                   |
| DL1.5  | chr2  | 28830072 28830073 | 0.31±0.003                  | 52.054±4.234                   |
| DL1.4  | chr1  | 42204926 42204927 | 0.02±0.003                  | 12.649±3.677                   |

Correlation between HELP-tagging and bisulphite MassArray (Sequenom) is high for the control loci shown. Standard error values for each type of assay at each locus are shown.

**Supplementary Figure 5.** Correlations between HELP-tagging and targeted bisulphite sequencing (TBS) results

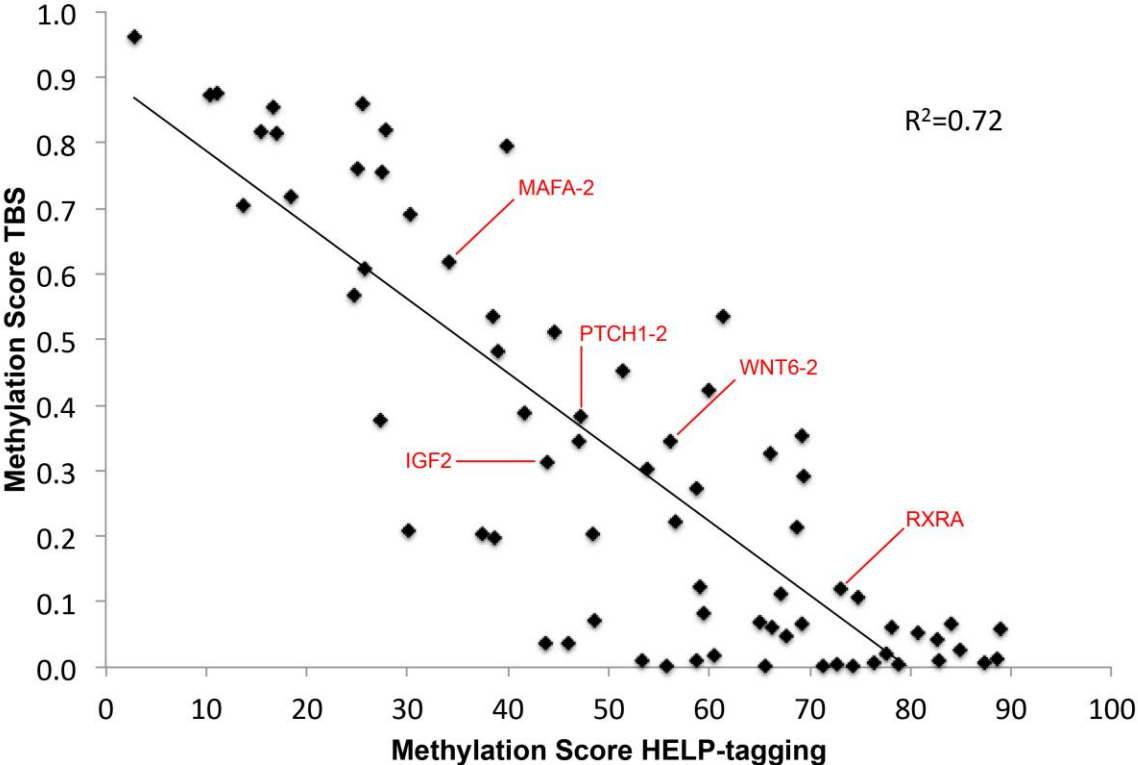

**Supplementary Figure 6.** Illustration of validation data for *MAFA*

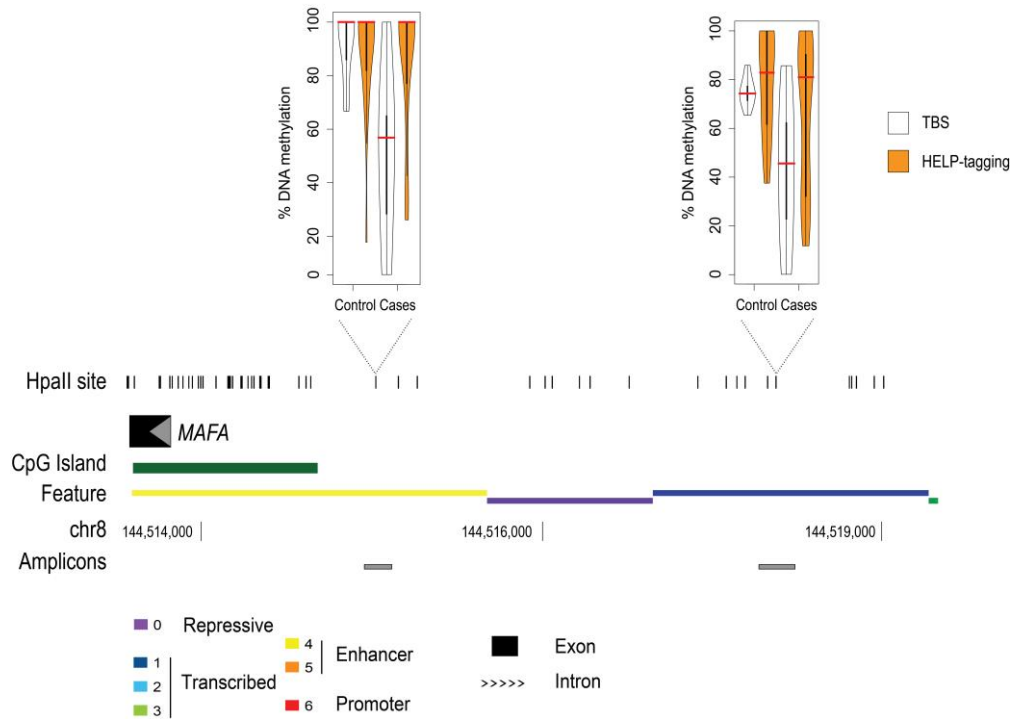

Validation of significant loci of interest by targeted bisulphite sequencing (TBS) in Cohort 2 for loci at the *MAFA* gene. Candidate differentially-methylated loci are shown as the HpaII sites within the amplicon regions (gray boxes), with results of DNA methylation distributions for controls and cases (IUGR and LGA combined) from HELP-tagging (orange) and TBS (white) depicted as violin plots (mean shown in red). The results show concordance for similar types of changes between HELP-tagging and TBS results at these loci.

## Supplementary Figure 7 Principal Component Analysis

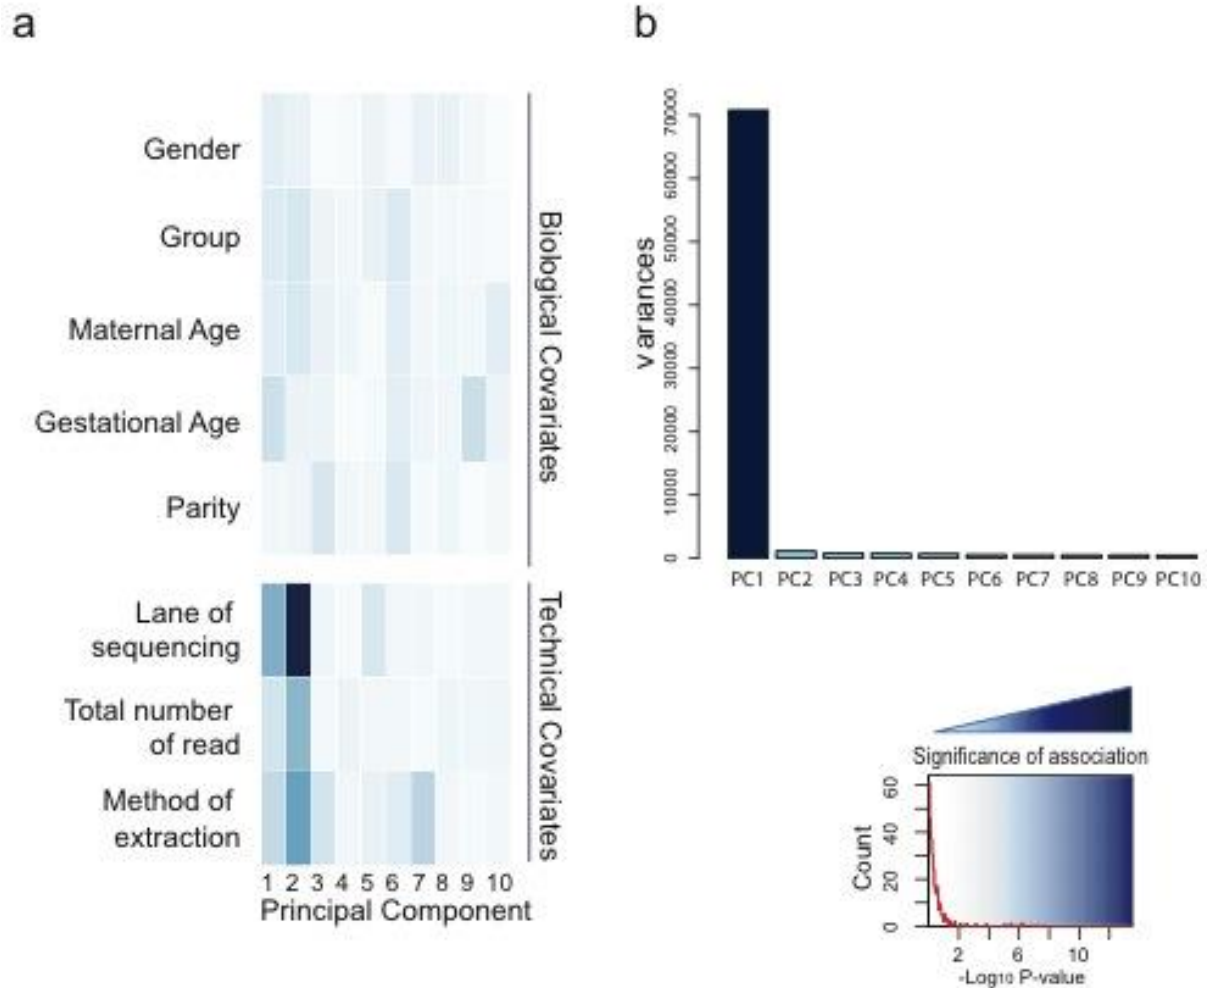

**a)** A heatmap is shown displaying the  $-\log_{10} p$  values of linear regression for top ranking principal components for each known covariate. The color keys correspond to numeric values for each covariate, with dark blue indicating greatest significance. The majority of variation is accounted for by experimental influences, with PC2 significantly associated with lane of sequencing, indicating samples run simultaneously, an indicator of experimental batch effects.

**b)** The relative contributions of the top 10 principal components are shown, demonstrating that the greatest variance is linked to principal component 1. The potential confounding effects of this variability were included in our statistical model.

**Supplementary Table 1** Top 10 pathways from Gene Set Enrichment Analysis

|                                             | UGR/control (males only) | LGA/control (females only) | Cases/control | LGA/control | UGR/control |
|---------------------------------------------|--------------------------|----------------------------|---------------|-------------|-------------|
| KEGG MATURITY ONSET DIABETES OF THE YOUNG   |                          |                            |               |             |             |
| KEGG HEDGEHOG SIGNALING PATHWAY             |                          |                            |               |             |             |
| KEGG NEUROACTIVE LIGAND RECEPTOR INTER      |                          |                            |               |             |             |
| KEGG BASAL CELL CARCINOMA                   |                          |                            |               |             |             |
| KEGG MAPK SIGNALING PATHWAY                 |                          |                            |               |             |             |
| KEGG PATHWAYS IN CANCER                     |                          |                            |               |             |             |
| KEGG MELANOMA                               |                          |                            |               |             |             |
| KEGG CYTOKINE CYTOKINE RECEPTOR INTERACTION |                          |                            |               |             |             |
| KEGG ECM RECEPTOR INTERACTION               |                          |                            |               |             |             |
| KEGG WNT SIGNALING PATHWAY                  |                          |                            |               |             |             |
| KEGG FOCAL ADHESION                         |                          |                            |               |             |             |
| KEGG CALCIUM SIGNALING PATHWAY              |                          |                            |               |             |             |
| KEGG SMALL CELL LUNG CANCER                 |                          |                            |               |             |             |
| KEGG REGULATION OF ACTIN CYTOSKELETON       |                          |                            |               |             |             |
| KEGG TGF BETA SIGNALING PATHWAY             |                          |                            |               |             |             |
| KEGG SYSTEMIC LUPUS ERYTHEMATOSUS           |                          |                            |               |             |             |
| KEGG TGF BETA SIGNALING PATHWAY             |                          |                            |               |             |             |



**Supplementary Table 2** Gene set enrichment scores for KEGG *Maturity onset diabetes of the young* and *Hedgehog signaling* pathways

| Comparison                 | Pathways                             | KEGG code | Rank | FDR q-value | Number of candidate genes in pathway | Total number of genes in pathway | Total number of genes compared |
|----------------------------|--------------------------------------|-----------|------|-------------|--------------------------------------|----------------------------------|--------------------------------|
| IUGR/control               | Maturity onset diabetes of the young | 4950      | 3    | 1.16E-06    | 9                                    | 25                               | 577                            |
|                            | Hedgehog signaling                   | 4340      | 8    | 1.50E-04    | 8                                    | 56                               | 577                            |
| LGA/control                | Maturity onset diabetes of the young | 4950      | 7    | 4.96E-05    | 9                                    | 25                               | 712                            |
|                            | Hedgehog signaling                   | 4340      | 5    | 7.20E-06    | 10                                   | 56                               | 712                            |
| Cases/control              | Maturity onset diabetes of the young | 4950      | 4    | 1.25E-08    | 12                                   | 25                               | 817                            |
|                            | Hedgehog signaling                   | 4340      | 9    | 1.33 E-04   | 10                                   | 56                               | 817                            |
| IUGR/control (males only)  | Maturity onset diabetes of the young | 4950      | 2    | 3.89E-05    | 6                                    | 25                               | 284                            |
|                            | Hedgehog signaling                   | 4340      | 8    | 9.47E-03    | 5                                    | 56                               | 284                            |
| LGA/control (females only) | Maturity onset diabetes of the young | 4950      | 6    | 5.41E-07    | 8                                    | 25                               | 571                            |
|                            | Hedgehog signaling                   | 4340      | 9    | 1.25E-04    | 8                                    | 56                               | 571                            |

“Cases” include both IUGR and LGA.

**Supplementary Table 3** Correlations between HELP-tagging and targeted bisulphite sequencing (TBS) results

| Rank      | Primer         | Locus        |                  | Methylation Score TBS | Methylation Score HELP-Tagging | Significance in HELP-Tagging |                           |
|-----------|----------------|--------------|------------------|-----------------------|--------------------------------|------------------------------|---------------------------|
| 10        | FGF19-1        | chr11        | 69520932         | 69520933              | 0.424                          | 59.883                       | Cases/control             |
| <b>14</b> | <b>PTCH1-2</b> | <b>chr9</b>  | <b>98275047</b>  | <b>98275048</b>       | <b>0.619</b>                   | <b>34.110</b>                | <b>Cases/control</b>      |
| 19        | TNF            | chr6         | 31540201         | 31540202              | 0.346                          | 56.093                       | Cases/control             |
| 23        | CACNA1H-1      | chr16        | 1201802          | 1201803               | 0.821                          | 27.804                       | Cases/control             |
| 24        | FGF17          | chr8         | 21899104         | 21899105              | 0.568                          | 24.645                       | Cases/control             |
| 26        | PIK3CD         | chr1         | 9704167          | 9704168               | 0.047                          | 67.702                       | Cases/control             |
| 27        | ZIC2           | chr13        | 100632469        | 100632470             | 0.010                          | 58.752                       | Cases/control             |
| 28        | ADAM17         | chr2         | 9696571          | 9696572               | 0.002                          | 55.812                       | Cases/control             |
| 29        | WNT9A          | chr1         | 228136504        | 228136505             | 0.071                          | 48.614                       | Cases/control             |
| <b>1</b>  | <b>MAFA-2</b>  | <b>chr8</b>  | <b>144518163</b> | <b>144518164</b>      | <b>0.691</b>                   | <b>30.332</b>                | <b>IUGR/control</b>       |
| 6         | PIK3CG         | chr7         | 106499616        | 106499617             | 0.291                          | 69.436                       | IUGR/control              |
| 7         | MAFA-1         | chr8         | 144514749        | 144514750             | 0.813                          | 17.054                       | IUGR/control              |
| 25        | PRDM8          | chr4         | 81111178         | 81111179              | 0.860                          | 25.505                       | IUGR/control              |
| 26        | NOTCH1-2       | chr9         | 139446647        | 139446648             | 0.272                          | 58.732                       | IUGR/control              |
| 27        | PDE2A          | chr11        | 72353085         | 72353086              | 0.203                          | 48.457                       | IUGR/control              |
| 15        | HDAC5          | chr17        | 42201632         | 42201633              | 0.510                          | 44.525                       | LGA/control               |
| 28        | KIF21B         | chr1         | 200990764        | 200990765             | 0.483                          | 38.941                       | LGA/control               |
| 30        | CACNA1H-2      | chr16        | 1195201          | 1195202               | 0.609                          | 25.671                       | LGA/control               |
| <b>31</b> | <b>WNT6-2</b>  | <b>chr2</b>  | <b>219718849</b> | <b>219718850</b>      | <b>0.382</b>                   | <b>47.212</b>                | <b>LGA/control</b>        |
| 32        | FGF19-3        | chr11        | 69521455         | 69521456              | 0.303                          | 53.908                       | LGA/control               |
| 33        | MAP3K6         | chr1         | 27693783         | 27693784              | 0.346                          | 47.064                       | LGA/control               |
| 34        | PDGFB-1        | chr22        | 39648277         | 39648278              | 0.387                          | 41.652                       | LGA/control               |
| 35        | AKT3-1         | chr1         | 244012361        | 244012362             | 0.112                          | 67.121                       | LGA/control               |
| 36        | WNT1           | chr12        | 49364443         | 49364444              | 0.122                          | 59.077                       | LGA/control               |
| 37        | TGFB3          | chr14        | 76448169         | 76448170              | 0.019                          | 60.550                       | LGA/control               |
| 28        | DVL1-2         | chr1         | 1289556          | 1289557               | 0.060                          | 66.172                       | IUGR/control (male only)  |
| 11        | FAS            | chr10        | 90743066         | 90743067              | 0.818                          | 15.468                       | IUGR/control (male only)  |
| 12        | CREBBP         | chr16        | 3931839          | 3931840               | 0.754                          | 27.549                       | IUGR/control (male only)  |
| 13        | SOCS3-3        | chr17        | 76357669         | 76357670              | 0.704                          | 13.688                       | IUGR/control (male only)  |
| 14        | PDGFB-2        | chr22        | 39649169         | 39649170              | 0.020                          | 77.537                       | IUGR/control (male only)  |
| 15        | SOCS3-1        | chr17        | 76356948         | 76356949              | 0.005                          | 78.834                       | IUGR/control (male only)  |
| 16        | FGF19-2        | chr11        | 69521089         | 69521090              | 0.222                          | 56.657                       | IUGR/control (male only)  |
| 17        | IRS1           | chr2         | 227665923        | 227665924             | 0.004                          | 72.704                       | IUGR/control (male only)  |
| 18        | DUSP4          | chr8         | 29211512         | 29211513              | 0.378                          | 27.241                       | IUGR/control (male only)  |
| 19        | PRR5           | chr22        | 45125757         | 45125758              | 0.197                          | 38.727                       | IUGR/control (male only)  |
| 20        | PTCH1-1        | chr9         | 98275305         | 98275306              | 0.209                          | 30.055                       | IUGR/control (male only)  |
| 5         | IL11           | chr19        | 55889042         | 55889043              | 0.327                          | 65.980                       | LGA/control (female only) |
| 8         | CACNA1B-1      | chr9         | 140768206        | 140768207             | 0.853                          | 16.610                       | LGA/control (female only) |
| 13        | ASPSR1         | chr17        | 79973811         | 79973812              | 0.452                          | 51.463                       | LGA/control (female only) |
| 17        | IHH            | chr2         | 219926005        | 219926006             | 0.059                          | 88.891                       | LGA/control (female only) |
| 18        | NOTCH1-1       | chr9         | 139446428        | 139446429             | 0.536                          | 38.446                       | LGA/control (female only) |
| 22        | CACNA1A        | chr19        | 13618496         | 13618497              | 0.215                          | 68.695                       | LGA/control (female only) |
| 23        | HDAC9          | chr7         | 18535586         | 18535587              | 0.106                          | 74.834                       | LGA/control (female only) |
| 24        | FGF19-4        | chr11        | 69524084         | 69524085              | 0.537                          | 61.399                       | LGA/control (female only) |
| 25        | WNT6-1         | chr2         | 219723712        | 219723713             | 0.060                          | 78.045                       | LGA/control (female only) |
| 26        | AKT3-2         | chr1         | 244012457        | 244012458             | 0.010                          | 82.822                       | LGA/control (female only) |
| 27        | SOCS3-4        | chr17        | 76357130         | 76357131              | 0.066                          | 69.250                       | LGA/control (female only) |
| 28        | MTOR           | chr1         | 11322845         | 11322846              | 0.001                          | 74.241                       | LGA/control (female only) |
| 29        | SOCS3-2        | chr17        | 76361238         | 76361239              | 0.068                          | 64.956                       | LGA/control (female only) |
| 30        | PKLR           | chr1         | 155278154        | 155278155             | 0.009                          | 53.269                       | LGA/control (female only) |
| 31        | EN2            | chr7         | 155252927        | 155252928             | 0.036                          | 45.914                       | LGA/control (female only) |
| 9         | DVL1-1         | chr1         | 1287677          | 1287678               | 0.875                          | 10.372                       | LGA/control (male only)   |
| 16        | CACNA1B-2      | chr9         | 140771750        | 140771751             | 0.353                          | 69.176                       | LGA/control (male only)   |
| 17        | DNMT3A         | chr2         | 25517428         | 25517429              | 0.084                          | 59.364                       | LGA/control (male only)   |
| <b>31</b> | <b>RXRA</b>    | <b>chr9</b>  | <b>137216751</b> | <b>137216752</b>      | <b>0.119</b>                   | <b>73.037</b>                | <b>Published</b>          |
| <b>33</b> | <b>IGF2</b>    | <b>chr11</b> | <b>2169273</b>   | <b>2169274</b>        | <b>0.312</b>                   | <b>43.906</b>                | <b>Published</b>          |
| 2         | IDO2           | chr8         | 39828379         | 39828380              | 0.962                          | 2.790                        | Technical                 |
| 3         | MAD1L1         | chr7         | 1882979          | 1882980               | 0.762                          | 25.045                       | Technical                 |
| 4         | ATG5           | chr6         | 106641124        | 106641125             | 0.876                          | 11.086                       | Technical                 |
| 20        | TUBBP5         | chr9         | 141044663        | 141044664             | 0.066                          | 84.119                       | Technical                 |
| 21        | FCER2          | chr19        | 7767120          | 7767121               | 0.718                          | 18.454                       | Technical                 |
| 24        | CMTM4          | chr16        | 66730037         | 66730038              | 0.013                          | 88.609                       | Technical                 |
| 25        | CACNA1H-3      | chr16        | 1201802          | 1201803               | 0.796                          | 39.815                       | Technical                 |
| 26        | LRP10          | chr14        | 23341680         | 23341681              | 0.008                          | 87.309                       | Technical                 |
| 27        | BMI            | chr10        | 22614934         | 22614935              | 0.025                          | 84.910                       | Technical                 |
| 29        | WWP2           | chr16        | 69895519         | 69895520              | 0.042                          | 82.621                       | Technical                 |
| 30        | CDNK2          | chr9         | 21996333         | 21996334              | 0.053                          | 80.694                       | Technical                 |
| 32        | KCNA2          | chr1         | 111150385        | 111150386             | 0.007                          | 76.340                       | Technical                 |
| 34        | TMEM           | chr16        | 431296           | 431297                | 0.002                          | 71.380                       | Technical                 |
| 35        | MLL5           | chr7         | 104654143        | 104654144             | 0.002                          | 65.534                       | Technical                 |
| 36        | ETV5           | chr3         | 185824820        | 185824821             | 0.204                          | 37.425                       | Technical                 |
| 37        | SSH1           | chr12        | 109220314        | 109220315             | 0.036                          | 43.659                       | Technical                 |

The table summarizes mean DNA methylation scores for TBS (Cohort 2, n=24 subjects) and HELP-tagging (Cohort 1, n=60 subjects) with each primer. Primers are grouped by the comparison showing the locus to be a candidate differentially-methylated site, or whether they were loci of interest in the literature or part of our standard panel used to test a range of DNA methylation values. Within each group, loci are ranked in order of descending correlation score. The figure depicting these correlations is shown as **Supplementary Figure 3**.

**Supplementary Table 4.** Correlation and significance between HELP-tagging and TBS (targeted bisulphite sequencing) for *WNT6*, *PTCH1*, *MAFA*, *IGF2*, and *RXRA*

| Name         | chromosome | postion start | position end | HELP-tagging              |                        |                       | Targeted Bisulphite Sequencing |                        |                       | DNA methylation changes Cases/Control | HELP-tagging (cases/control) p value | TBS (cases/control) p value |
|--------------|------------|---------------|--------------|---------------------------|------------------------|-----------------------|--------------------------------|------------------------|-----------------------|---------------------------------------|--------------------------------------|-----------------------------|
|              |            |               |              | control (mean $\pm$ s.d.) | IUGR (mean $\pm$ s.d.) | LGA (mean $\pm$ s.d.) | control (mean $\pm$ s.d.)      | IUGR (mean $\pm$ s.d.) | LGA (mean $\pm$ s.d.) |                                       |                                      |                             |
| <i>WNT6</i>  | chr2       | 219718849     | 219718850    | 59.3 $\pm$ 6.04           | 48.8 $\pm$ 8.39        | 33.5 $\pm$ 7.03       | 0.30 $\pm$ 0.05                | 0.42 $\pm$ 0.03        | 0.42 $\pm$ 0.04       | ↑                                     | 0.045                                | 0.023                       |
| <i>PTCH1</i> | chr9       | 98275047      | 98275048     | 54.2 $\pm$ 6.81           | 34.6 $\pm$ 7.84        | 13.5 $\pm$ 5.63       | 0.56 $\pm$ 0.02                | 0.68 $\pm$ 0.05        | 0.62 $\pm$ 0.03       | ↑                                     | 0.001                                | 0.014                       |
| <i>MAFA</i>  | chr8       | 144518163     | 144518164    | 21.8 $\pm$ 4.75           | 39.8 $\pm$ 6.35        | 29.4 $\pm$ 7.26       | 0.75 $\pm$ 0.02                | 0.67 $\pm$ 0.05        | 0.65 $\pm$ 0.04       | ↓                                     |                                      |                             |
| <i>IGF2</i>  | chr11      | 2169273       | 2169274      | 61.3 $\pm$ 5.40           | 41.0 $\pm$ 7.17        | 29.5 $\pm$ 6.29       | 0.28 $\pm$ 0.02                | 0.35 $\pm$ 0.07        | 0.31 $\pm$ 0.03       | ↑                                     |                                      |                             |
| <i>RXRA</i>  | chr9       | 137216751     | 137216752    | 83.8 $\pm$ 3.54           | 71.8 $\pm$ 7.16        | 63.5 $\pm$ 6.93       | 0.09 $\pm$ 0.03                | 0.16 $\pm$ 0.04        | 0.10 $\pm$ 0.02       | ↑                                     |                                      |                             |

↑ increased in cases compared with controls  
 ↓ decreased in cases compared with controls

(mean  $\pm$  s.d.)

“Cases” include both IUGR and LGA.

**Supplementary Table 5** Bisulphite PCR primers

|           | Forward Primer                | Reverse Primer                | Locus |           |           |
|-----------|-------------------------------|-------------------------------|-------|-----------|-----------|
|           |                               |                               | chr   | Start     | End       |
| FAS       | TGATTTTAGAGGAGTGAATATAAATAGT  | CCCTAAATAAATACAAAACCTTCTTATTT | chr10 | 90742953  | 90743166  |
| MTOR      | TTGAAAAATAGGTTAATAGTAATGAAGAA | AAAAATATCACAAAATCCATAAAAAAC   | chr1  | 11322666  | 11323061  |
| IGF2      | GGTATTTTGTAGGATTGGGTAG        | TTTACTAAAACCCCTCCTTATCTC      | chr11 | 2169149   | 2169471   |
| DVL1-1    | TTTGAATTTGTGTTGAGATTTGTATT    | TTCAAATTCCTTAAAACTAACCTAA     | chr1  | 1287562   | 1287863   |
| DVL1-2    | TTTTTGTAAAGTATTTGGTTTTTGTAGT  | ACTACCCCAATATAAATCTCCTTC      | chr1  | 1289426   | 1289641   |
| PKLR      | TTTTTTTGTAGTGGTGGGATTATAG     | AAACTTACTTAAAATAACTTTCTCATC   | chr1  | 155277970 | 155278260 |
| FGF19-1   | TTGGAATTTGAATTTAAATAGTGGG     | CCTCAAAACAAACCTAAAAACAAC      | chr11 | 69520825  | 69521003  |
| FGF19-2   | TTAGGTTTGTGTTGAGGGTATAAG      | ATAACAAAATCCATCCCTAAACT       | chr11 | 69520986  | 69521144  |
| FGF19-3   | GGATTTTGAAGTATTTGTGTGTT       | TAAACCTACTACTACCCATTACC       | chr11 | 69521371  | 69521521  |
| FGF19-4   | TTGGAATTTGAATTTAAATAGTGGG     | ATAAACTCACACACAACAAACC        | chr11 | 69523935  | 69524148  |
| PDE2A     | GGTTTGGGTATAGTTTTAGTGTGT      | AAAAAAAACCCCTCCTAATTCTA       | chr11 | 72353010  | 72353210  |
| KIF21B    | GGTAATTTGATTGGGAATTAGAGAT     | AAAAAATAAACAAAAACCCCTAC       | chr1  | 200990599 | 200990843 |
| SSH1      | TTTAGGGGTTTGGTTGGTAGTAG       | ACCAAAAAAATAAATCTCTTACTAT     | chr7  | 155612063 | 155612219 |
| WNT9A     | TTTTTATTTTAAATTGTGGGAGTG      | CACCATTCTACTTCAAAAACAACCT     | chr1  | 228136336 | 228136559 |
| AKT3-1    | TTGATTTGTGGTAAGTATTTTTTTT     | ATCACCATCCCTTATTTAAATTTT      | chr1  | 244012247 | 244012387 |
| AKT3-2    | GAAATTTTAAATAAGGGATGGTGATT    | TACAAATAAACAAACCAACCTCTC      | chr1  | 244012362 | 244012527 |
| WNT1      | GGGAGATAAGGGGAATTGTTTAT       | CCAAACCTCAAAAATACTAAAAATC     | chr12 | 49364215  | 49364527  |
| MAP3K6    | TTGTAGGTATTTGTTGAATGAATGGT    | ATCCCACTCAAAAATAAATACTTT      | chr1  | 27693704  | 27693874  |
| ZIC2      | TTGTGGTTTTAATGTTATAGAGTAAGTTT | AATCAAAAATAAAAAACAACCCAAC     | chr13 | 100632361 | 100632672 |
| TGFB3     | TATTGGAAGGTAGGGAGGTAGGT       | AAAACAAAAATCAAAATCAAAAAA      | chr14 | 76447980  | 76448253  |
| CACNA1H-1 | TTGGAATTTAATTGGATTTTTGAA      | AAAAAAAACCCCTACCCAATAAAC      | chr16 | 1201589   | 1201828   |
| CACNA1H-2 | GGTTGATTGTTGGTTGGTAGTAT       | AAAAAACCCCTCCTAATAACA         | chr16 | 1195101   | 1195420   |
| CREBBP    | GAGGTGTTTTTATTTAGTTAGTTATTTG  | AAATTTTTTAAACAAATTTCTCCCTCT   | chr16 | 3931650   | 3931954   |
| HDAC5     | GGGGTTAATTTTTGGATTGTAAA       | AACACAAAATCAAAAAATCTTTC       | chr17 | 42201290  | 42201657  |
| SOCS3-1   | TTGTTAGGTTTTTTGTTAATTTGA      | CCTAAAATAAATAACCCCTTCTC       | chr17 | 76356847  | 76357172  |
| SOCS3-2   | TTTTTAAATTTTATGGATGGGAAG      | ACTAAAATAAATAACCCCAACTAC      | chr17 | 76361080  | 76361344  |
| SOCS3-3   | TTAGATATTAGGATAATGAGGTGTGAAA  | ATCTCACTAAATCCCAACACATAC      | chr17 | 76357570  | 76357763  |
| SOCS3-4   | GTTTTTATAGGGAGGGTAGTTTG       | AACCATCTAACATAACCTAAACCC      | chr17 | 76357045  | 76357258  |
| ASPCR1    | GGAGTATGTTTTTATTTGGGAGAG      | AAAAAAACTTCAAAAACCAAAACC      | chr17 | 79973587  | 79973863  |
| CACNA1A   | TGATGAGTTAATAGTAGAAGGATTTATT  | CCTTCTCTTACAAAATACTAAAAAAC    | chr19 | 13618266  | 13618526  |
| IL11      | TTTTAGGTTGTGAGGGTGATATATG     | AACAAAAAAACAAAATTAACCCC       | chr19 | 55888954  | 55889166  |
| PIK3CD    | GTAAGTGGGTTTTTTGTTAGGATG      | CCCCAAAATACTAAAATCCAAC        | chr1  | 9703989   | 9704333   |
| FCER2     | GGAGTTTGGAGTTTGTGTTGTT        | CACCAATTCTTACTTAAAAAATAA      | chr19 | 7766909   | 7767172   |
| WNT6-1    | AGGGGGTATAGGGTATTAAGATAT      | AAAAAAATAAAAAACAATAAACC       | chr2  | 219723566 | 219723838 |
| WNT6-2    | AATTTGGTAGTTTTTTTGTATTGTTT    | AAATACTAATAAATTATCCCACAACA    | chr2  | 219718756 | 219718886 |
| IHH       | TTTTATTTATGTTTTGTTTTTTGTTG    | CCTCCTACCTTTTAAATTTACTTCC     | chr2  | 219925691 | 219926089 |
| PDGFB-1   | GGGGGTTATAGGTTAAAGTAGGTAG     | CCCATAACCAAAACACATCTATAC      | chr22 | 39648162  | 39648366  |
| PDGFB-2   | GGAGGATGAAAATATTTTTGGTAGT     | CCTCCCCACTAATAATCTTAAAAA      | chr22 | 39649072  | 39649205  |
| PRR5      | GGGGTTTGGATTTGTTTTATAATATT    | TAAATCCATCTTAACTCCAAC         | chr22 | 45125631  | 45125954  |

|           |                               |                               |       |           |           |
|-----------|-------------------------------|-------------------------------|-------|-----------|-----------|
| DNMT3A    | GGTTGTAGTTTAGGAGTGGGAGATA     | CCAAATTAACAAAACTCAACAAC       | chr2  | 25517343  | 25517495  |
| ADAM17    | TTTTTTGTTTAGTGTGTTTAGGTGG     | AAAATATCTACAACCCCTCCCTAC      | chr2  | 9696365   | 9696694   |
| PRDM8     | TTGGTTTTTGAAGTGATTTTTTAT      | CCTAACTCAACCTTAATTTCTCC       | chr4  | 81111084  | 81111234  |
| TNF       | GAAATAGTAGTATTTTTAAGTTTTGGGG  | AACTAACAAATAAAAAATCAAAACAAAA  | chr6  | 31539936  | 31540275  |
| PIK3CG    | GGTTATTGGAATAAAGTTGATTTTTGT   | AAAAAACCAAAAAATACCCAC         | chr7  | 106499501 | 106499709 |
| EN2       | TTAGATTTGAAATTTGTTTATTGTTTT   | CATTATCTTACAAAAATTTTTAAACCC   | chr7  | 155252849 | 155253093 |
| MAFA-1    | TGTGGGGTTTTTTTTATGGTATTT      | ACCCTCTCCTAATCTCCTTAACCTA     | chr8  | 144514505 | 144514825 |
| MAFA-2    | GGGTGTATTATTGTTTGGGATT        | TCCCTACCCCTATATTAACCATAAC     | chr8  | 144518069 | 144518326 |
| FGF17     | AGTTGAGGTTTGAGTTTGTGTT        | CAACCCCAACCTACTTCATTATAA      | chr8  | 21898974  | 21899188  |
| DUSP4     | ATGGGATTGTTAAGGAGAGGTT        | AAATCAAAAATTAACATCAAACTAAAAT  | chr8  | 29211287  | 29211573  |
| RXRA      | GGTATGTTATGTGTAGTGGGAAGT      | TTCCTAACCCCTAAACCCCTAC        | chr9  | 137216663 | 137216837 |
| NOTCH1-1  | TTTTAGAGGGATAATGTTGGTGTTT     | ATTTCCAAACCATATTCATTTACA      | chr9  | 139446216 | 139446545 |
| NOTCH1-2  | GGAGTTGGGTTATTTTTGATTTTAT     | TTATTAACCTTTTACCTTCCCCC       | chr9  | 139446349 | 139446671 |
| CACNA1B-1 | TTTAATTTGTGATTTTTTTAGTGG      | AAAATTTAAAATACTCATCAAAACTATA  | chr9  | 140768015 | 140768385 |
| CACNA1B-2 | AGGGTAGAGTTGGGAGTTTAGGATA     | CCCTAAAACCTACAACCCAAAACCTAA   | chr9  | 140771569 | 140771895 |
| TUBBP5    | TTGATTTTTAGAGATTTTTTAGAGTTGT  | AAAAACCTTTTCTCACCTTTAC        | chr9  | 141044480 | 141044778 |
| PTCH1-1   | TTGGGGTTTTATTAGTTAGTAGGAGTT   | ATCCCAACACAAAAACAAATATTT      | chr9  | 98275124  | 98275440  |
| PTCH1-2   | ATGTATGTTTGTGTAGGGGATTGT      | ACCAAAAAACAAAAACCATTTAAA      | chr9  | 98274926  | 98275085  |
| KCNA2     | TAGGAGAGTTTAGTTGGGTGTTGT      | AACCAATCTTTACTAAATAACAAAAAAA  | chr1  | 111150231 | 111150519 |
| ETV5      | GTTTAAAGGTTAATTTTTTTGTTTGATA  | CCTCAACTCACTACTAAAATTTCTC     | chr3  | 185824757 | 185825135 |
| ATG5      | TGATTATAAATAGAAAGGAGAGTGTGT   | ACAAAAATTATAAACAAAAATCAATAAAA | chr6  | 106641046 | 106641328 |
| MAD1L1    | TTTTTTTGTTTTTTGGGTTTTATAG     | CCCCAAATCAACCTTCATTAC         | chr7  | 1882879   | 1883041   |
| HDAC9     | GAAATGGATTGTTGAGAATAGAGTTG    | ACTTCTAAACCACATCTCAAAAAAAA    | chr7  | 18592088  | 18592402  |
| MLL5      | TGGAGTTTTTTAGTTTTAGTGGG       | TAAAACTAATTCTTTCCCCCTTTC      | chr7  | 104654097 | 104654380 |
| IDO2      | TAAAATATTTTTATTGGAAGAAGATTT   | CCATCTTAACCAACATAATAAAACC     | chr8  | 39828244  | 39828501  |
| CDNK2     | TTAGATTTTATAGGGGAGGAAAGTGA    | AAATAACATATAACCCCAACACAA      | chr9  | 21996087  | 21996397  |
| TMEM      | AGGGAATAGAAATGTAAGGGGAGTT     | ATAAAAAACCCAAAAACTCTACC       | chr16 | 431080    | 431394    |
| CACNA1H-3 | GAGGTGTTGTTGAAAGGATTTGTAT     | CCTCCAACAAAAAACCTACT          | chr16 | 1201709   | 1201971   |
| WWP2      | GTGAGGTTGGTAGTTTAGAGGTAGG     | TCCTCCCACTCAAATATAAATTAA      | chr16 | 69895419  | 69895588  |
| BMI       | GTAGGGAGGGTAGAATTGTTTTT       | ACTTCTAATCTCTCAAAATCATTCTATAA | chr10 | 22614844  | 22615158  |
| LRP10     | TAGGATGTTGTTGTTATTTTTTT       | AAATTTCTTCTTCCCTAAACAACCTC    | chr14 | 23341508  | 23341901  |
| IRS1      | TTTGGTATTAAGGATTTATAGAGATGTTA | ACAAAACCTAAAAACAACCATCC       | chr2  | 227665734 | 227666028 |
| CMTM4     | GGAAAATTTGTTATAGGTTGTTAAGATTA | TCTACAACCTTCTTAAAAACCC        | chr16 | 66729872  | 66730091  |

These loci were chosen based on the criteria shown in **Supplementary Table 3**.

**Supplementary Table 6** Bisulphite conversion efficiencies (C→T in CH context)

|        | Conversion Efficiency (%) |
|--------|---------------------------|
| CBP184 | 99.662                    |
| CBP196 | 99.669                    |
| CBP262 | 99.670                    |
| CBP267 | 99.695                    |
| CBP269 | 99.684                    |
| CBP270 | 99.727                    |
| CBP274 | 99.613                    |
| CBP280 | 99.654                    |
| CBP285 | 99.691                    |
| CBP295 | 99.634                    |
| CBP302 | 99.696                    |
| CBP343 | 99.643                    |
| CBP345 | 99.698                    |
| CBP349 | 99.651                    |
| CBP351 | 99.653                    |
| CBP352 | 99.666                    |
| CBP353 | 99.666                    |
| CBP354 | 99.677                    |
| CBP358 | 99.617                    |
| CBP362 | 99.618                    |
| CBP364 | 99.646                    |
| CBP368 | 99.651                    |
| CBP373 | 99.624                    |
| CBP381 | 99.626                    |
| Mean   | 99.660                    |

**Supplementary Table 7** Genes associated with candidate differentially-methylated loci corresponding to KEGG *Maturity onset diabetes of the young* and *Hedgehog signaling* pathways

|                            | Maturity onset diabetes of the young                                                                                                                                                                                        | Hedgehog signaling                                                                                                                                                               |
|----------------------------|-----------------------------------------------------------------------------------------------------------------------------------------------------------------------------------------------------------------------------|----------------------------------------------------------------------------------------------------------------------------------------------------------------------------------|
| IUGR/control               | <p><i>FOXA2</i><br/> <i>MAFA</i><br/> <i>MNX1</i><br/> <i>NKX2-2</i><br/> <i>NKX6-1</i><br/> <i>NR5A2</i><br/> <i>ONECUT1</i><br/> <i>PAX6</i><br/> <i>PKLR</i></p>                                                         | <p><i>BMP7</i><br/> <i>GLI3</i><br/> <i>PTCH1</i><br/> <i>WNT10A</i><br/> <i>WNT5A</i><br/> <i>WNT6</i><br/> <i>WNT9A</i><br/> <i>ZIC2</i></p>                                   |
| LGA/control                | <p><i>FOXA2</i><br/> <i>MAFA</i><br/> <i>MNX1</i><br/> <i>NKX2-2</i><br/> <i>NKX6-1</i><br/> <i>NR5A2</i><br/> <i>ONECUT1</i><br/> <i>PAX6</i><br/> <i>PKLR</i></p>                                                         | <p><i>BMP7</i><br/> <i>GLI3</i><br/> <i>LRP2</i><br/> <i>PTCH1</i><br/> <i>WNT1</i><br/> <i>WNT10B</i><br/> <i>WNT2B</i><br/> <i>WNT3A</i><br/> <i>WNT6</i><br/> <i>ZIC2</i></p> |
| Case/control               | <p><i>FOXA2</i><br/> <i>MAFA</i><br/> <i>MNX1</i><br/> <i>NEUROD1</i><br/> <i>NEUROG3</i><br/> <i>NKX2-2</i><br/> <i>NKX6-1</i><br/> <i>ONECUT1</i><br/> <i>PAX4</i><br/> <i>PAX6</i><br/> <i>PDX1</i><br/> <i>PKLR</i></p> | <p><i>BMP7</i><br/> <i>GLI1</i><br/> <i>GLI3</i><br/> <i>PTCH1</i><br/> <i>SHH</i><br/> <i>WNT10B</i><br/> <i>WNT2B</i><br/> <i>WNT6</i><br/> <i>WNT9A</i><br/> <i>ZIC2</i></p>  |
| IUGR/control (males only)  | <p><i>MAFA</i><br/> <i>NEUROG3</i><br/> <i>NKX2-2</i><br/> <i>NKX6-1</i><br/> <i>ONECUT1</i><br/> <i>PAX6</i></p>                                                                                                           | <p><i>BMP4</i><br/> <i>BMP8A</i><br/> <i>PTCH1</i><br/> <i>WNT9A</i><br/> <i>ZIC2</i></p>                                                                                        |
| LGA/control (females only) | <p><i>FOXA2</i><br/> <i>MNX1</i><br/> <i>NEUROD1</i><br/> <i>NKX2-2</i><br/> <i>NKX6-1</i><br/> <i>ONECUT1</i><br/> <i>PAX6</i><br/> <i>PKLR</i></p>                                                                        | <p><i>IHH</i><br/> <i>LRP2</i><br/> <i>PTCH1</i><br/> <i>SHH</i><br/> <i>WNT3A</i><br/> <i>WNT6</i><br/> <i>WNT7B</i><br/> <i>ZIC2</i></p>                                       |
